# Supplementary material for: Genome-Wide Identification and Expression Analysis of the PIN Auxin Transporter Gene Family in Zanthoxylum armatum DC
Source: MDPI journal article supplement (doi:10.3390/agriculture12091318), 2022-08-26
Supplement: s1 [file s1]

## Supplementary Materials

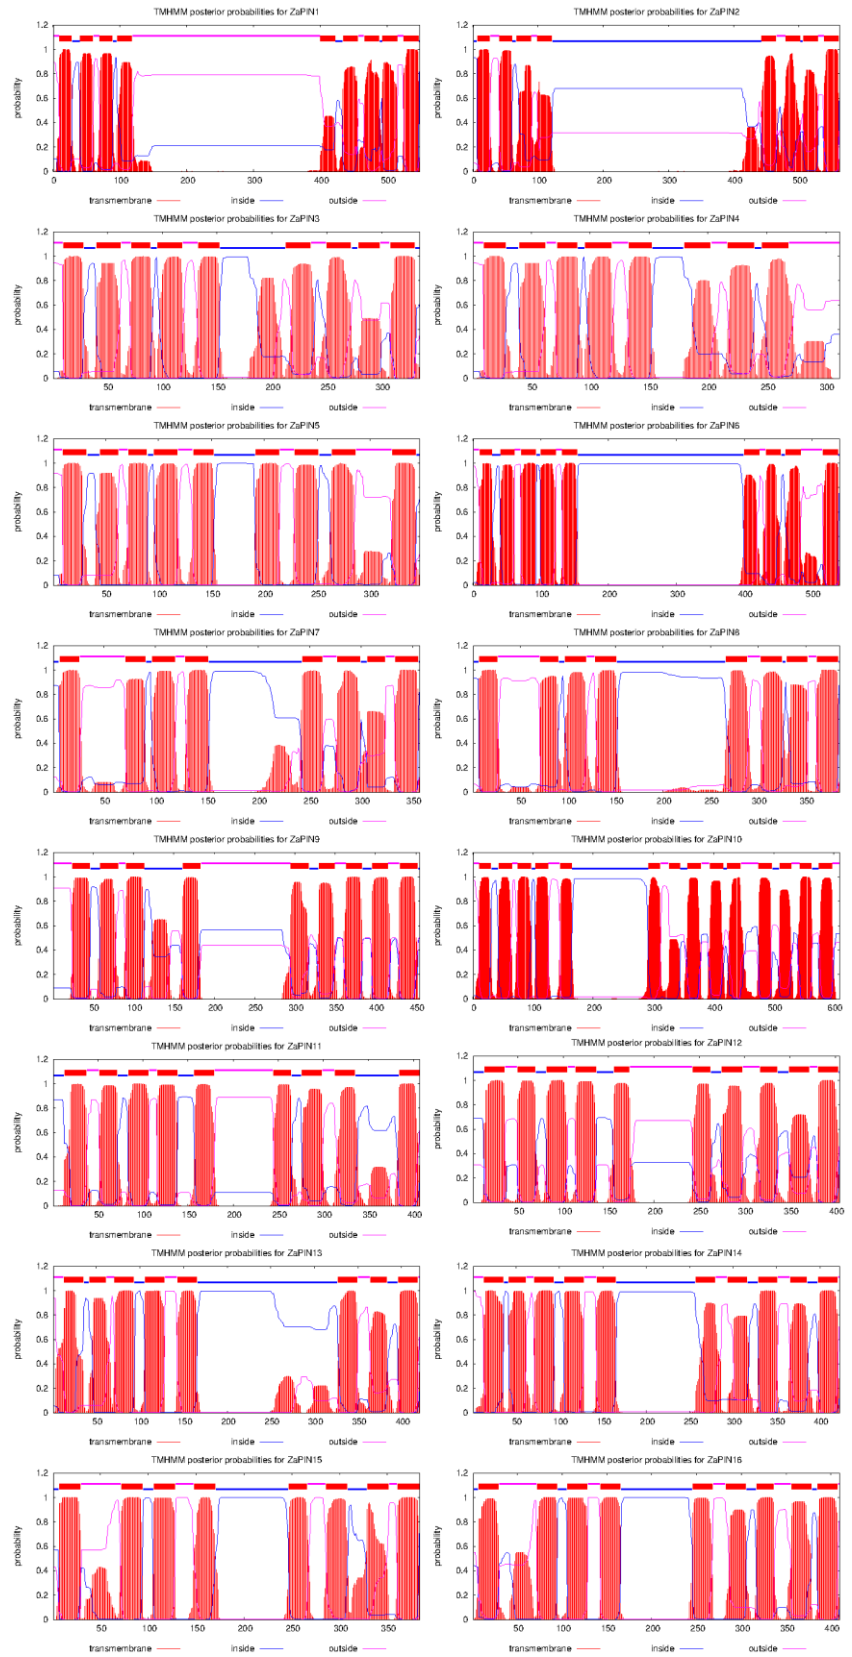

**Figure S1.** Prediction of transmembrane structure character of ZaPINs. The red peak represents the transmembrane domain of the protein.

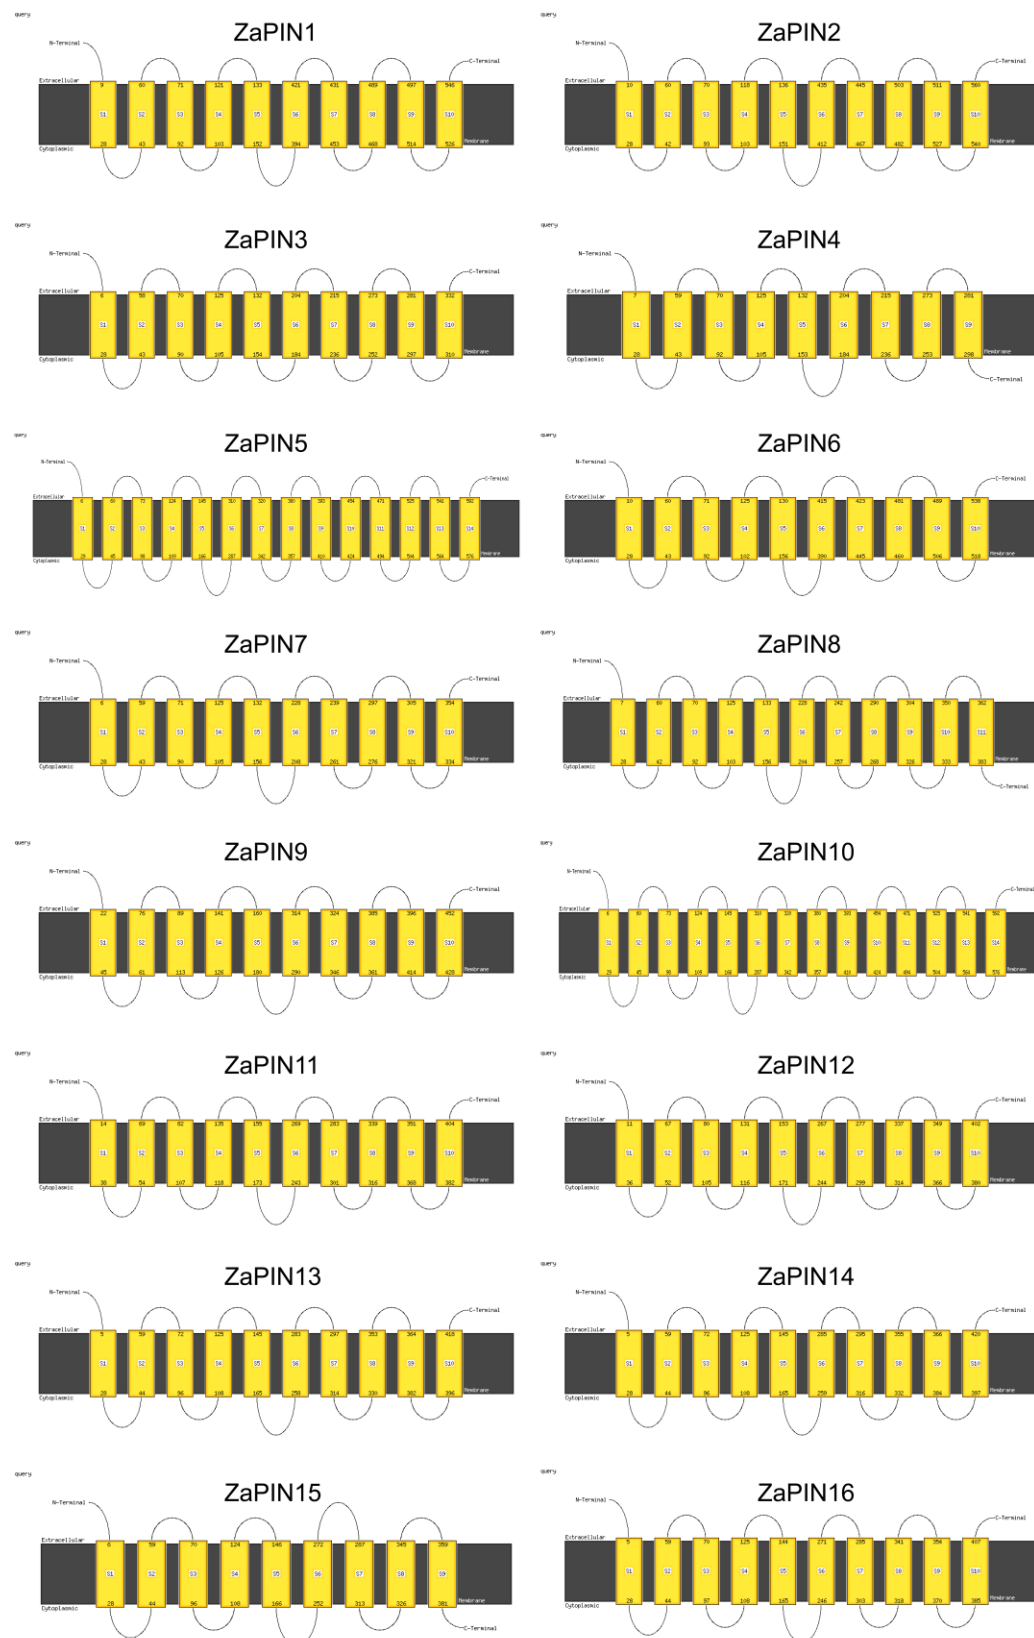

**Figure S2.** Predicted TM helix of ZaPINs. The cytoplasmic and extracellular sides of the membrane are labeled, and the start and end of each transmembrane helix are indicated with a number.

**Table S1.** PIN gene of *Citrus sinensis* renamed.

| Gene name | Gene ID           |
|-----------|-------------------|
| CsPIN1    | Cs_ont_2g012470.2 |
| CsPIN2    | Cs_ont_1g029550.1 |
| CsPIN3    | Cs_ont_6g012520.3 |
| CsPIN4    | Cs_ont_4g013510.1 |
| CsPIN5    | Cs_ont_7g019650.1 |
| CsPIN6    | Cs_ont_3g000440.1 |
| CsPIN7    | Cs_ont_6g001790.1 |
| CsPIN8    | Cs_ont_6g023470.1 |
| CsPIN9    | Cs_ont_6g023600.1 |
| CsPIN10   | Cs_ont_4g025100.1 |
| CsPIN11   | Cs_ont_6g023630.1 |
| CsPIN12   | Cs_ont_3g007910.1 |
| CsPIN13   | Cs_ont_6g004690.1 |
